# Supplementary material for: Identification of a Rule to Predict Response to Sarilumab in Patients with Rheumatoid Arthritis Using Machine Learning and Clinical Trial Data
Source: Springer Nature journal article supplement (doi:10.1007/s40744-021-00361-5), 2021-09-14
Supplement: MOESM1 [file 24439916]

**Rehberg M et al. Identification of a rule to predict response to sarilumab in patients with rheumatoid arthritis using machine learning and clinical trial data**

**SUPPLEMENTARY MATERIAL**

**Table S1.** Endpoints included in performance analysis of the anti-CCP+CRP rule (assessed at baseline and Week 24)

| <b>Measure</b> | <b>Endpoints</b>                                                                                                                                          | <b>Studies</b>                       |
|----------------|-----------------------------------------------------------------------------------------------------------------------------------------------------------|--------------------------------------|
| ACR            | <ul style="list-style-type: none"> <li>Response rates (ACR20, ACR50, and ACR70)</li> </ul>                                                                | MOBILITY, MONARCH, TARGET, ASCERTAIN |
| CDAI           | <ul style="list-style-type: none"> <li>Response rates (REM: <math>\leq 2.8</math>; LDA: <math>\leq 10.0</math>)</li> <li>Absolute values (CFB)</li> </ul> | MOBILITY, MONARCH, TARGET            |
| DAS28-CRP      | <ul style="list-style-type: none"> <li>Response rates (REM: <math>&lt; 2.6</math>; LDA: <math>&lt; 3.2</math>)</li> <li>Absolute values (CFB)</li> </ul>  | MOBILITY, MONARCH, TARGET, ASCERTAIN |
| DAS28-ESR      | <ul style="list-style-type: none"> <li>Response rates (REM: <math>&lt; 2.6</math>; LDA: <math>&lt; 3.2</math>)</li> <li>Absolute values (CFB)</li> </ul>  | MONARCH                              |
| HAQ-DI         | <ul style="list-style-type: none"> <li>Response rates (MCID: <math>\geq 0.22</math>)</li> <li>Absolute values (CFB)</li> </ul>                            | MONARCH, TARGET, ASCERTAIN           |

ACR20, ACR 20%; ACR50, ACR 50%; ACR70, ACR 70%; CDAI, Clinical Disease Activity Index; CFB, change from baseline; DAS28-CRP, 28-joint Disease Activity Score using C-reactive protein; DAS28-ESR, DAS28 using erythrocyte sedimentation rate; HAQ-DI; Health Assessment Questionnaire-Disability Index; LDA, low disease activity; MCID, minimal clinically important difference; REM, remission.

**Table S2:** Averaged metrics of different machine learning algorithms (10-fold cross-validated, MOBILITY training data - normalized, endpoint ACR20)

| <b>Model</b>                                       | <b>Accuracy</b> | <b>AUC</b> | <b>Recall</b> | <b>Precision</b> | <b>F1</b> | <b>Kappa</b> |
|----------------------------------------------------|-----------------|------------|---------------|------------------|-----------|--------------|
| Extra Trees Classifier                             | 0.703           | 0.5833     | 0.9232        | 0.7184           | 0.8062    | 0.2053       |
| Quadratic Discriminant Analysis                    | 0.6758          | 0.5062     | 0.9875        | 0.6788           | 0.8039    | 0.0154       |
| Light Gradient Boosting Machine                    | 0.6758          | 0.543      | 0.8411        | 0.738            | 0.7717    | 0.1536       |
| CatBoost Classifier                                | 0.6742          | 0.6118     | 0.9214        | 0.6958           | 0.7907    | 0.0791       |
| Gradient Boosting Classifier                       | 0.6644          | 0.5604     | 0.8286        | 0.7214           | 0.7667    | 0.1588       |
| Logistic Regression                                | 0.6508          | 0.5606     | 0.7554        | 0.7617           | 0.7273    | 0.1823       |
| Random Forest Classifier                           | 0.647           | 0.5787     | 0.8018        | 0.7136           | 0.7504    | 0.1301       |
| Ridge Classifier                                   | 0.6409          | 0          | 0.7554        | 0.7522           | 0.73      | 0.1459       |
| K Neighbors Classifier                             | 0.6402          | 0.5584     | 0.8821        | 0.6791           | 0.765     | 0.018        |
| Ada Boost Classifier                               | 0.622           | 0.453      | 0.7607        | 0.6949           | 0.7199    | 0.073        |
| Linear Discriminant Analysis                       | 0.6152          | 0.6497     | 0.7161        | 0.7365           | 0.7065    | 0.1069       |
| SVM – Linear Kernel                                | 0.6068          | 0          | 0.6911        | 0.7428           | 0.6939    | 0.1098       |
| Decision Tree Classifier                           | 0.5167          | 0.4753     | 0.5839        | 0.6596           | 0.6116    | -0.0494      |
| Naïve Bayes                                        | 0.4212          | 0.5692     | 0.2732        | 0.675            | 0.36      | 0.0038       |
| Metrics Over Training Data for<br>AntiCCP-CRP Rule |                 |            |               |                  |           |              |
| GUIDE                                              | 0.644172        |            | 0.618182      | 0.809524         | 0.701031  | 0.280627     |

**Table S3:** Baseline characteristics of rule-positive and -negative patients in MONARCH

| Parameter                   | Sarilumab 200 mg                             |                                  | Adalimumab                                   |                                  |
|-----------------------------|----------------------------------------------|----------------------------------|----------------------------------------------|----------------------------------|
|                             | Rule-positive patients <sup>a</sup> (N = 62) | Rule-negative patients (N = 116) | Rule-positive patients <sup>a</sup> (N = 73) | Rule-negative patients (N = 107) |
| DAS28-CRP                   | 6.6 ± 0.7                                    | 5.7 ± 0.8                        | 6.4 ± 0.8                                    | 5.8 ± 0.9                        |
| DAS28-ESR                   | 7.1 ± 0.8                                    | 6.7 ± 0.7                        | 6.9 ± 0.9                                    | 6.7 ± 0.8                        |
| CDAI                        | 46.3 ± 12.1                                  | 42.1 ± 11.6                      | 41.6 ± 12.0                                  | 42.7 ± 12.0                      |
| HAQ-DI                      | 1.8 ± 0.5                                    | 1.6 ± 0.6                        | 1.9 ± 0.6                                    | 1.4 ± 0.6                        |
| ESR, mm/h                   | 54.6 ± 25.5                                  | 41.1 ± 18.2                      | 58.8 ± 26.8                                  | 38.6 ± 14.1                      |
| SJC28                       | 14.4 ± 5.5                                   | 12.4 ± 5.4                       | 12.1 ± 5.1                                   | 13.0 ± 5.7                       |
| Presence of RF, n (%)       | 52 (85.2)                                    | 66 (57.9)                        | 61 (85.9)                                    | 54 (50.9)                        |
| Presence of anti-CCP, n (%) | 62 (100)                                     | 72 (62.1)                        | 73 (100)                                     | 65 (60.7)                        |
| RANKL, pmol/L               | 2401 ± 3959                                  | 1159 ± 2987                      | 3853 ± 9607                                  | 822 ± 1178                       |
| OPG, pmol/L                 | 6.8 ± 3.2                                    | 6.2 ± 2.2                        | 7.7 ± 3.2                                    | 6.5 ± 2.6                        |
| OC, ng/mL                   | 20.0 ± 10.0                                  | 21.9 ± 11.1                      | 18.6 ± 8.7                                   | 21.6 ± 9.3                       |
| Prior DMARD use, n (%)      | 62 (100)                                     | 116 (100)                        | 73 (100)                                     | 107 (100)                        |

<sup>a</sup>Patients who were anti-CCP-positive and had CRP >12.3 mg/L. Values are mean ± SD, unless otherwise indicated. Anti-CCP, anti-cyclic citrullinated peptide; CDAI, Clinical Disease Activity Index; DAS28-CRP, 28-joint Disease Activity Score using C-reactive protein; DAS28-ESR, DAS28 using erythrocyte sedimentation rate; HAQ-DI; Health Assessment Questionnaire-Disability Index; OC, osteocalcin; OPG, osteoprotegerin; RANKL, receptor activator of NF-kappa B ligand; RF, rheumatoid factor; SJC, swollen joint count.

**Table S4:** Baseline characteristics of rule-positive and -negative patients in TARGET

| Parameter                   | Sarilumab 200 mg                                |                                    | Placebo                                         |                                    |
|-----------------------------|-------------------------------------------------|------------------------------------|-------------------------------------------------|------------------------------------|
|                             | Rule-positive patients <sup>a</sup><br>(N = 97) | Rule-negative patients<br>(N = 83) | Rule-positive patients <sup>a</sup><br>(N = 93) | Rule-negative patients<br>(N = 87) |
| DAS28-CRP                   | 6.6 ± 0.9                                       | 5.9 ± 1.0                          | 6.4 ± 0.8                                       | 5.9 ± 0.7                          |
| CDAI                        | 46.6 ± 13.6                                     | 41.0 ± 12.7                        | 43.5 ± 13.4                                     | 41.8 ± 10.7                        |
| HAQ-DI                      | 1.9 ± 0.6                                       | 1.7 ± 0.7                          | 1.9 ± 0.6                                       | 1.6 ± 0.6                          |
| SJC28                       | 14.4 ± 6.4                                      | 11.8 ± 5.9                         | 13.1 ± 5.8                                      | 13.2 ± 5.6                         |
| Presence of RF, n (%)       | 87 (89.7)                                       | 44 (53.0)                          | 84 (91.3)                                       | 57 (65.5)                          |
| Presence of anti-CCP, n (%) | 97 (100)                                        | 40 (48.2)                          | 93 (100)                                        | 57 (65.5)                          |
| RANKL, pmol/L               | 2937 ± 3263                                     | 2108 ± 3341                        | 2796 ± 5844                                     | 1697 ± 2848                        |
| OPG, pmol/L                 | 6.2 ± 3.4                                       | 6.9 ± 4.0                          | 6.8 ± 2.7                                       | 6.1 ± 2.2                          |
| OC, ng/mL                   | 21.7 ± 10.8                                     | 20.0 ± 10.3                        | 18.8 ± 7.3                                      | 18.1 ± 9.8                         |
| Prior TNFi use, n (%)       |                                                 |                                    |                                                 |                                    |
| ≥1 prior TNFi               | 97 (100)                                        | 83 (100)                           | 93 (100)                                        | 87 (100)                           |
| >1 prior TNFi               | 29 (29.9)                                       | 20 (24.1)                          | 28 (30.1)                                       | 20 (23.0)                          |

<sup>a</sup>Patients who were anti-CCP-positive and had CRP >12.3 mg/L. Values are mean ± SD, unless otherwise indicated. Anti-CCP, anti-cyclic citrullinated peptide; CDAI, Clinical Disease Activity Index; DAS28-CRP, 28-joint Disease Activity Score using C-reactive protein; HAQ-DI; Health Assessment Questionnaire-Disability Index; OC, osteocalcin; OPG, osteoprotegerin; RANKL, receptor activator of NF-kappa B ligand; RF, rheumatoid factor; SJC, swollen joint count; TNFi, tumor necrosis factor inhibitor.

**Table S5:** Baseline characteristics of rule-positive and -negative patients in ASCERTAIN

| Parameter                   | Sarilumab 200 mg                                |                                    | Tocilizumab                                     |                                    |
|-----------------------------|-------------------------------------------------|------------------------------------|-------------------------------------------------|------------------------------------|
|                             | Rule-positive patients <sup>a</sup><br>(N = 18) | Rule-negative patients<br>(N = 33) | Rule-positive patients <sup>a</sup><br>(N = 45) | Rule-negative patients<br>(N = 52) |
| DAS28-CRP                   | 6.4 ± 0.9                                       | 5.7 ± 0.8                          | 6.3 ± 1.0                                       | 5.5 ± 0.9                          |
| HAQ-DI                      | 1.7 ± 0.6                                       | 1.8 ± 0.5                          | 1.9 ± 0.6                                       | 1.7 ± 0.7                          |
| SJC28                       | 12.8 ± 5.4                                      | 11.3 ± 4.9                         | 12.1 ± 5.9                                      | 11.3 ± 4.9                         |
| Presence of RF, n (%)       | 16 (88.9)                                       | 13 (40.6)                          | 41 (91.1)                                       | 37 (71.2)                          |
| Presence of anti-CCP, n (%) | 18 (100)                                        | 18 (54.5)                          | 45 (100)                                        | 37 (71.2)                          |
| Prior DMARD use, n (%)      | 18 (100)                                        | 33 (100)                           | 45 (100)                                        | 52 (100)                           |

<sup>a</sup>Patients who were anti-CCP-positive and had CRP >12.3 mg/L. Values are mean ± SD, unless otherwise indicated. Anti-CCP, anti-cyclic citrullinated peptide; DAS28-CRP, 28-joint Disease Activity Score using C-reactive protein; HAQ-DI; Health Assessment Questionnaire-Disability Index; RF, rheumatoid factor; SJC, swollen joint count.

**Figure S1.** Relative importance of variables, by model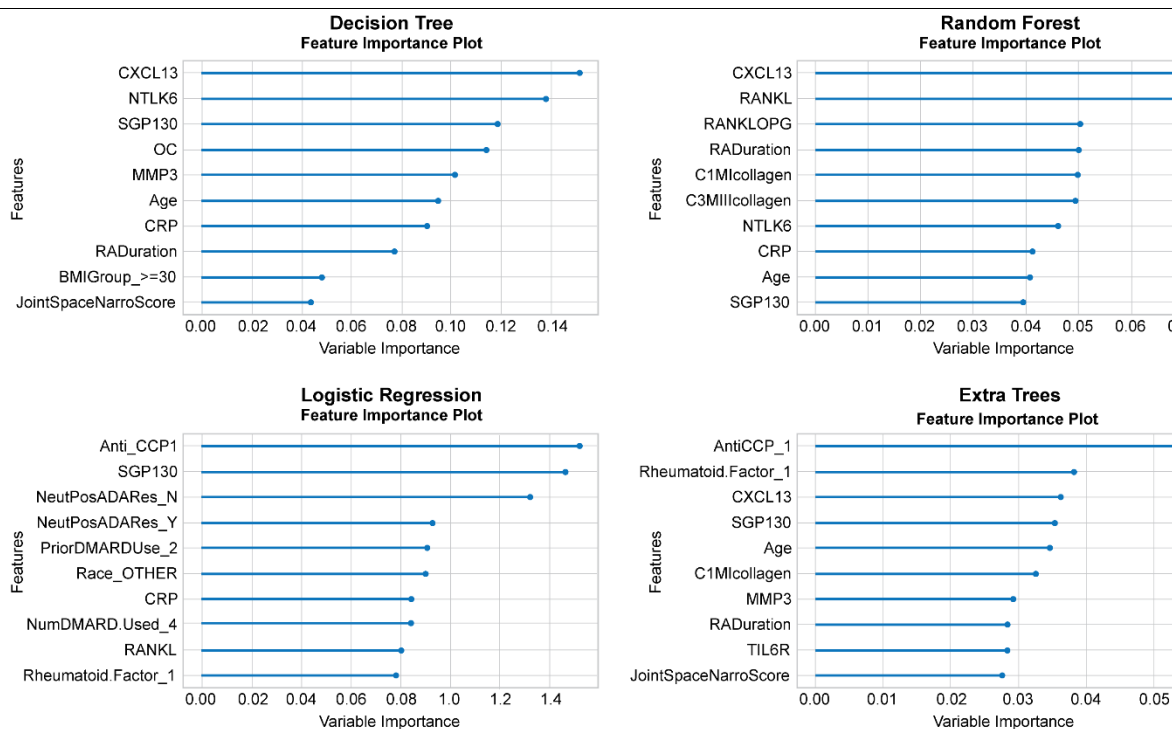

Anti-CCP, anti-cyclic citrullinated peptide; BMI, body-mass index; C1M, MMP-degraded type 1 collagen; C3M, MMP-degraded type 3 collagen; CRP, C-reactive protein; CXCL13, C x C motif chemokine ligand 13; DMARD, disease-modifying antirheumatic drug; MMP, matrix metalloproteinase; Neut Pos ADA Res, neutralizing positive anti-drug-antibodies response; Num DMARD Used, number of DMARDs used; OC, osteocalcin; OPG, osteoprotegerin; RA, rheumatoid arthritis; RANKL, receptor activator of NF-kappa B ligand; SGP130, soluble glycoprotein 130; TIL6R, total IL-6-receptor.

**Figure S2.** Response rates in rule-positive and rule-negative patients from MOBILITY and TARGET

**a. MOBILITY response rates**

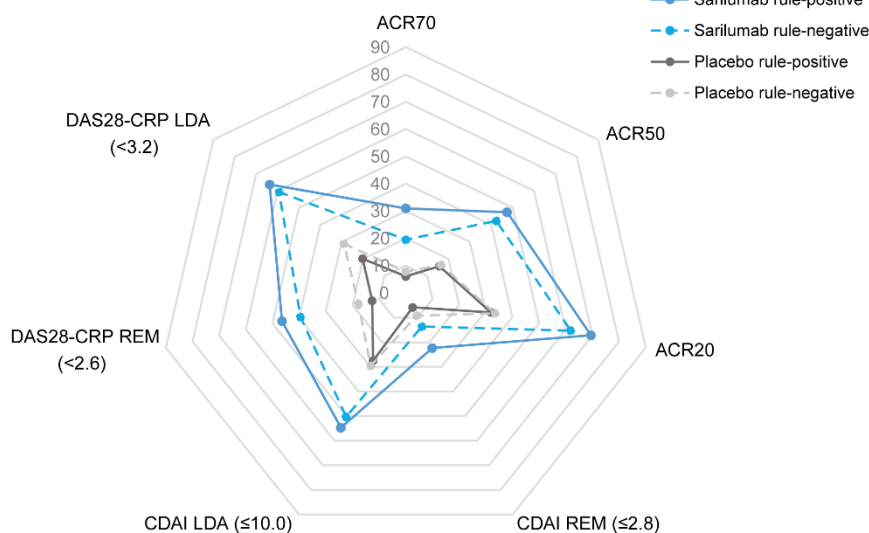

**b. TARGET response rates**

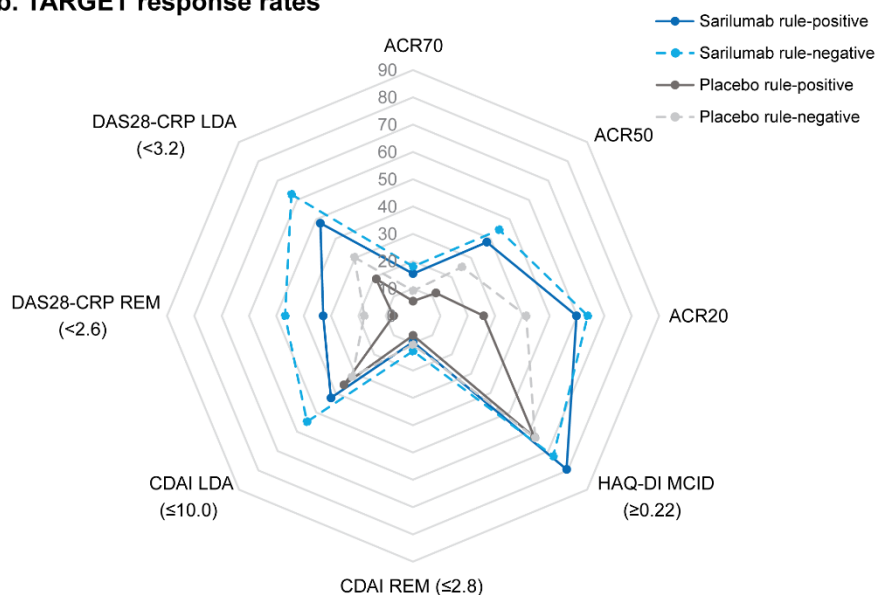

The patient stratification rule was the combined presence of anti-CCP and CRP  $> 12.3$  mg/L.

ACR20, ACR 20%; ACR50, ACR 50%; ACR70, ACR 70%; anti-CCP, anti-cyclic citrullinated peptide; CDAI, Clinical Disease Activity Index; DAS28-CRP, 28-joint Disease Activity Score using C-reactive protein; DAS28-ESR, DAS28 using erythrocyte sedimentation rate; HAQ-DI; Health Assessment Questionnaire-Disability Index; LDA, low disease activity; MCID, minimal clinically important difference; REM, remission.

**Figure S3.** Clinical rule application scenario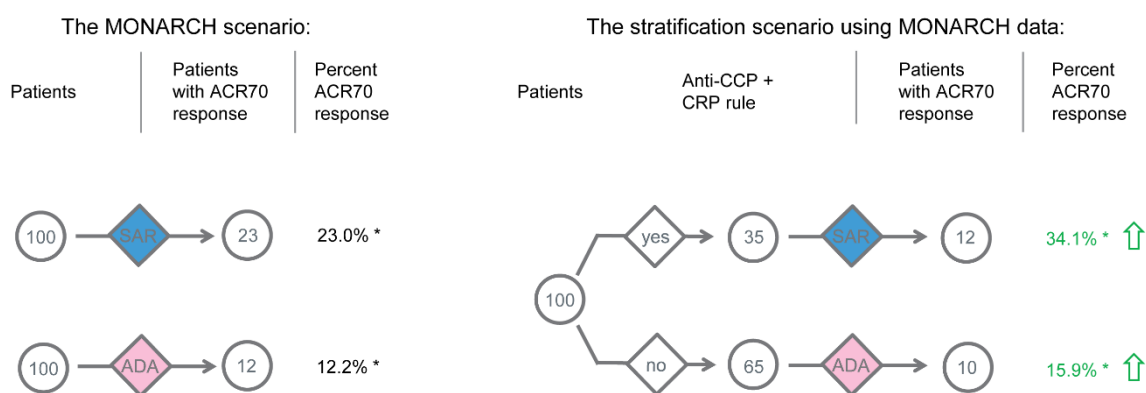

The patient stratification rule was the combined presence of anti-CCP and CRP >12.3 mg/L.

\*Calculated from MONARCH 200 mg study.

ACR70, ACR 70%; ADA, adalimumab; anti-CCP, anti-cyclic citrullinated peptide; CRP, C-reactive protein; SAR, sarilumab.



**Figure S4.** ASCERTAIN: Response rates in rule-positive and rule-negative tocilizumab-treated patients

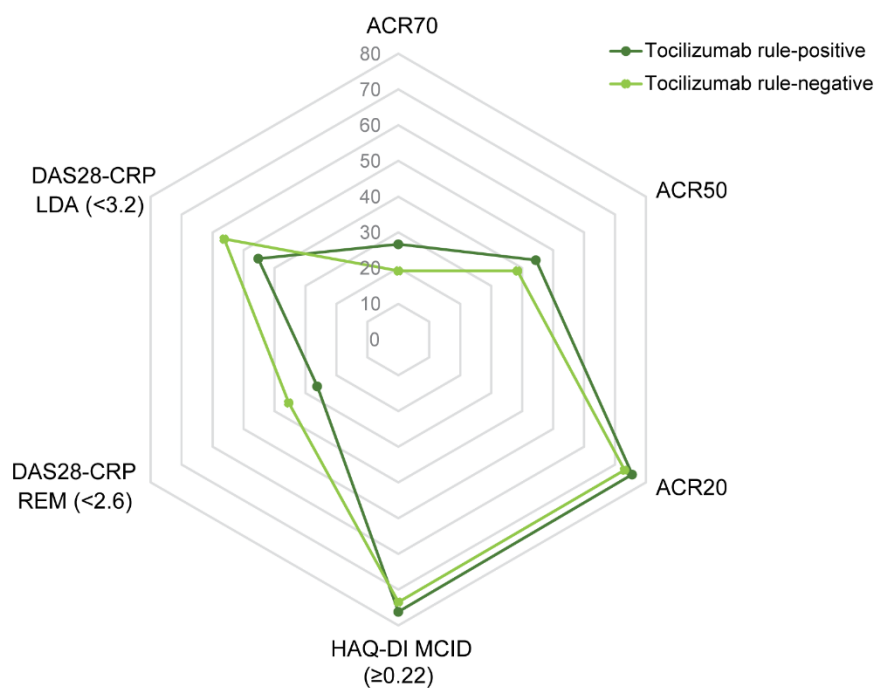

The patient stratification rule was the combined presence of anti-CCP and CRP >12.3 mg/L.

ACR20, ACR 20%; ACR50, ACR 50%; ACR70, ACR 70%; DAS28-CRP, 28-joint Disease Activity Score using C-reactive protein; HAQ-DI; Health Assessment Questionnaire-Disability Index; LDA, low disease activity; MCID, minimal clinically important difference; REM, remission.
